# Supplementary material for: Genomic Investigation of Salmonella Isolates Recovered From a Pig Slaughtering Process in Hangzhou, China
Source: Front Microbiol. 2021 Jul 8;12:704636. doi: 10.3389/fmicb.2021.704636 (PMC8298193; doi:10.3389/fmicb.2021.704636)
Supplement: Supplementary file 1 [file Table_1.XLSX]

## Sheet: S1. MIC
							Antimicrobial agents															Penicillins	β-lactams combination	Cephems		Aminoglycosides			Phenicols	Folate pathway inhibitors	Macrolides	Fluoroquinolones		Tetracyclines	Polymyxins
			Source	Serovar	SubSpecies	ST	AMP	AMC	CF	CX	KAN	GEN	STR	CHL	TST	AZI	NAL	CIP	TET	COL	NoofAM	Ampicillin	Amoxicillin/Clavulanate Potassium	Ceftiofur	cefoxitin	Kanamycin	Gentamycin	Streptomycin	Chloramphenicol	Trimethoprim/Sulfamethox azole	Azithromycin	Nalidixic acid	Ciprofloxacin	Tetracycline	Colistin	Resistance Pattern ("I" considered "R")
SAL01849	H1-2-2	CL100115974_L01_589.fq.fasta	CSAS	Typhimurium	senterica	19	64	8	0.25	1	2	0.5	32	32	32	2	32	0.0625	32	0.0625	6	R	S	S	S	S	S	R	R	R	S	R	S	R	S	AMPI-STR-CHL-TST-NAL-TET
SAL01850	H1-2-3	CL100115974_L02_590.fq.fasta	CSAS	London	senterica	155	0.5	0.25	0.5	1	0.5	0.03125	2	0.5	0.5	2	1	0.015625	0.0625	0.0625	0	S	S	S	S	S	S	S	S	S	S	S	S	S	S
SAL01851	HI-4-3	CL100115974_L02_591.fq.fasta	CSAS	Typhimurium	senterica	19	1	0.25	0.5	2	2	0.5	8	1	0.25	2	32	0.0625	1	0.125	1	S	S	S	S	S	S	S	S	S	S	R	S	S	S	NAL
SAL01852	H1-4-2	CL100115974_L02_592.fq.fasta	CSAS	Typhimurium	senterica	19	64	8	1	1	4	0.5	8	32	0.25	2	32	0.0625	32	0.25	4	R	S	S	S	S	S	S	R	S	S	R	S	R	S	AMP-CHL-NAL-TET
SAL01853	H4-2-1	CL100115974_L02_593.fq.fasta	CSAS	Rissen	senterica	469	64	8	0.5	1	2	0.25	32	16	32	2	2	0.03125	32	0.125	4	R	S	S	S	S	S	R	I	R	S	S	S	R	S	AMP-STR-CHL-TST-TET
SAL01854	A6-1-3	CL100115974_L02_594.fq.fasta	CSBS	Typhimurium	senterica	19	64	8	0.5	1	2	0.25	4	64	0.25	2	32	0.0625	32	0.25	4	R	S	S	S	S	S	S	R	S	S	R	S	R	S	AMP-CHL-NAL-TET
SAL01855	D5-2-1	CL100115974_L02_595.fq.fasta	CSBS	Typhimurium	senterica	19	64	8	0.5	2	2	0.25	8	64	32	2	32	0.0625	32	0.25	5	R	S	S	S	S	S	S	R	R	S	R	S	R	S	AMP-CHL-TST-NAL-TET
SAL01856	D5-2-2	CL100115974_L02_596.fq.fasta	CSBS	Typhimurium	senterica	19	64	8	0.5	2	2	0.25	8	64	32	2	32	0.0625	32	0.25	5	R	S	S	S	S	S	S	R	R	S	R	S	R	S	AMP-CHL-TST-NAL-TET
SAL01857	H6-3-5	CL100115975_L01_562.fq.fasta	CSAS	Typhimurium	senterica	19	64	8	1	4	4	0.5	8	2	32	2	2	0.015625	32	0.0625	3	R	S	S	S	S	S	S	S	R	S	S	S	R	S	AMP-TST-TET
SAL01858	H6-3-6	CL100115974_L02_503.fq.fasta	CSAS	Rissen	senterica	469	32	8	1	4	2	0.5	32	2	32	4	2	0.015625	32	0.0625	4	R	S	S	S	S	S	R	S	R	S	S	S	R	S	AMP-STR-TST-TET
SAL01859	H6-3-4	CL100115974_L02_504.fq.fasta	CSAS	Rissen	senterica	469	64	8	1	4	4	0.5	32	2	32	4	4	0.015625	32	0.0625	4	R	S	S	S	S	S	R	S	R	S	S	S	R	S	AMP-STR-TST-TET
SAL01860	H1-1-1	CL100115974_L02_505.fq.fasta	CSAS	Typhimurium	senterica	19	64	8	0.5	2	2	0.5	8	32	32	4	32	0.0625	32	0.25	5	R	S	S	S	S	S	S	R	R	S	R	S	R	S	AMP-CHL-TST-NAL-TET
SAL01861	H1-1-2	CL100115974_L02_506.fq.fasta	CSAS	Derby	senterica	40	64	8	0.5	4	1	0.125	16	8	32	32	32	0.125	32	0.0625	5	R	S	S	S	S	S	I	S	R	R	R	I	R	S	AMP-STR-TST-AZI-NAL-CIP-TET
SAL01862	H1-1-3	CL100115974_L02_507.fq.fasta	CSAS	Typhimurium	senterica	19	64	8	0.5	2	4	1	8	32	0.5	4	32	0.0625	32	0.25	4	R	S	S	S	S	S	S	R	S	S	R	S	R	S	AMP-CHL-NAL-TET
SAL01863	J6-3-2	CL100115974_L02_508.fq.fasta	CSAS	Typhimurium	senterica	19	64	8	0.25	2	1	2	8	32	0.25	4	32	0.0625	32	0.25	4	R	S	S	S	S	S	S	R	S	S	R	S	R	S	AMP-CHL-NAL-TET
SAL01864	刮毛6-1-1	CL100115974_L02_509.fq.fasta	CSBS	London	senterica	155	64	2	0.5	2	2	0.25	2	2	0.25	4	1	0.015625	0.5	0.03125	1	R	S	S	S	S	S	S	S	S	S	S	S	S	S	AMP
SAL01865	刮毛6-1-2	CL100115974_L02_510.fq.fasta	CSBS	London	senterica	155	1	0.25	0.5	4	1	0.25	8	1	0.5	4	2	0.03125	0.5	0.03125	0	S	S	S	S	S	S	S	S	S	S	S	S	S	S
SAL01866	刮毛6-1-3	CL100115974_L02_511.fq.fasta	CSBS	London	senterica	155	1	0.25	0.5	4	2	0.25	8	1	0.25	4	2	0.015625	0.5	0.03125	0	S	S	S	S	S	S	S	S	S	S	S	S	S	S
SAL01867	刮毛6-3-3	CL100115974_L02_512.fq.fasta	CSBS	London	senterica	155	1	0.25	0.5	2	2	0.5	8	2	0.25	2	1	0.0625	0.5	0.03125	0	S	S	S	S	S	S	S	S	S	S	S	S	S	S
SAL01868	刮毛5-2-6	CL100115974_L02_513.fq.fasta	CSBS	London	senterica	155	1	0.25	1	2	2	0.5	8	1	0.25	2	2	0.015625	0.5	0.03125	0	S	S	S	S	S	S	S	S	S	S	S	S	S	S
SAL01869	刮毛5-2-7	CL100115974_L02_514.fq.fasta	CSBS	London	senterica	155	1	0.25	0.5	2	4	0.5	8	32	32	4	4	0.015625	16	32	4	S	S	S	S	S	S	S	R	R	S	S	S	R	R	CHL-TST-TET-COL
SAL01870	刮毛5-2-9	CL100115974_L02_515.fq.fasta	CSBS	London	senterica	155	1	0.25	0.5	2	4	0.5	8	8	32	4	2	0.015625	16	32	3	S	S	S	S	S	S	S	S	R	S	S	S	R	R	TST-TET-COL
SAL01871	刮毛5-1-3	CL100115974_L02_516.fq.fasta	CSBS	London	senterica	155	0.5	0.125	0.25	1	1	0.125	8	1	0.25	4	1	0.015625	0.5	0.03125	0	S	S	S	S	S	S	S	S	S	S	S	S	S	S
SAL01872	刮毛5-1-1	CL100115974_L02_517.fq.fasta	CSBS	London	senterica	155	0.5	0.125	0.5	0.5	2	0.25	4	1	0.25	4	1	0.015625	0.5	0.03125	0	S	S	S	S	S	S	S	S	S	S	S	S	S	S
SAL01873	刮毛5-1-4	CL100115974_L02_519.fq.fasta	CSBS	London	senterica	155	0.5	0.25	0.25	0.5	1	0.125	4	1	0.25	4	1	0.015625	0.5	0.03125	0	S	S	S	S	S	S	S	S	S	S	S	S	S	S
SAL01874	刮毛5-1-2	CL100115974_L02_518.fq.fasta	CSBS	London	senterica	155	64	16	0.5	1	2	0.25	8	2	0.25	4	2	0.015625	0.5	0.03125	1	R	I	S	S	S	S	S	S	S	S	S	S	S	S	AMP-AMC
SAL01875	下水道2-3	CL100115974_L02_520.fq.fasta	SS	Rissen	senterica	469	64	16	0.5	4	1	0.5	32	64	32	4	32	0.0625	32	0.03125	6	R	I	S	S	S	S	R	R	R	S	R	S	R	S	AMP-AMC-STR-CHL-TST-NAL-TET
SAL01876	下水道2-1	CL100115974_L02_521.fq.fasta	SS	Rissen	senterica	469	64	8	0.5	4	4	1	32	64	32	4	64	0.0625	32	0.0625	6	R	S	S	S	S	S	R	R	R	S	R	S	R	S	AMP-STR-CHL-TST-NAL-TET
SAL01877	下水道2-2	CL100115974_L02_522.fq.fasta	SS	Rissen	senterica	469	64	16	0.5	4	2	0.5	32	64	32	4	32	0.0625	32	0.03125	6	R	I	S	S	S	S	R	R	R	S	R	S	R	S	AMP-AMC-STR-CHL-TST-NAL-TET
SAL01878	下水道0-1	CL100115974_L02_523.fq.fasta	SS	Typhimurium	senterica	19	64	8	0.5	0.5	1	0.25	4	32	32	4	32	0.0625	32	0.125	5	R	S	S	S	S	S	S	R	R	S	R	S	R	S	AMP-CHL-TST-NAL-TET
SAL01879	下水道0-2	CL100115974_L02_524.fq.fasta	SS	Typhimurium	senterica	19	64	8	0.5	0.5	1	0.25	4	64	0.5	4	64	0.0625	32	0.125	4	R	S	S	S	S	S	S	R	S	S	R	S	R	S	AMP-CHL-NAL-TET
SAL01880	下水道0-3	CL100115974_L02_525.fq.fasta	SS	Typhimurium	senterica	19	64	8	0.25	0.5	1	0.25	4	32	0.5	2	64	0.0625	32	0.125	4	R	S	S	S	S	S	S	R	S	S	R	S	R	S	AMP-CHL-NAL-TET
SAL01881	D5-2-3	CL100115974_L02_531.fq.fasta	CSBS	Typhimurium	senterica	19	64	8	0.5	1	1	0.25	4	64	0.5	4	32	0.0625	32	0.25	4	R	S	S	S	S	S	S	R	S	S	R	S	R	S	AMP-CHL-NAL-TET
SAL01882	A6-1-1	CL100115974_L02_542.fq.fasta	CSBS	Typhimurium	senterica	19	64	8	1	1	2	0.5	4	32	0.25	2	32	0.0625	32	0.0625	4	R	S	S	S	S	S	S	R	S	S	R	S	R	S	AMP-CHL-NAL-TET
SAL01883	A6-2-1	CL100115975_L01_559.fq.fasta	CSBS	Typhimurium	senterica	19	64	8	0.5	1	1	0.25	4	32	0.25	2	32	0.0625	32	0.125	4	R	S	S	S	S	S	S	R	S	S	R	S	R	S	AMP-CHL-NAL-TET
SAL01884	A6-1-2	CL100115975_L01_560.fq.fasta	CSBS	Typhimurium	senterica	34	64	8	0.5	1	1	0.25	4	32	0.25	2	32	0.0625	32	0.125	4	R	S	S	S	S	S	S	R	S	S	R	S	R	S	AMP-CHL-NAL-TET
SAL01885	H1-4-1	CL100115975_L01_561.fq.fasta	CSAS	Typhimurium	senterica	34	64	8	0.25	1	1	0.25	8	64	0.5	4	32	0.0625	32	0.125	4	R	S	S	S	S	S	S	R	S	S	R	S	R	S	AMP-CHL-NAL-TET
SAL01886	FB40-3	CL100115974_L02_543.fq.fasta	FS	Typhimurium	senterica	19	64	8	0.5	1	2	0.5	4	64	0.5	4	64	0.0625	64	0.25	4	R	S	S	S	S	S	S	R	S	S	R	S	R	S	AMP-CHL-NAL-TET
SAL01887	FB13-1	CL100115974_L02_544.fq.fasta	FS	Typhimurium	senterica	19	64	8	0.25	1	2	0.5	8	32	0.5	4	64	0.0625	32	0.25	4	R	S	S	S	S	S	S	R	S	S	R	S	R	S	AMP-CHL-NAL-TET
SAL01890	FB12-1	CL100115974_L02_548.fq.fasta	FS	Typhimurium	senterica	19	1	0.25	0.25	1	2	0.5	16	2	0.25	4	32	2	32	0.25	3	S	S	S	S	S	S	I	S	S	S	R	R	R	S	STR-NAL-CIP-TET
SAL01891	FB12-4	CL100115974_L02_549.fq.fasta	FS	Typhimurium	senterica	19	64	8	0.5	1	2	0.25	32	32	0.5	4	32	0.0625	32	0.125	5	R	S	S	S	S	S	R	R	S	S	R	S	R	S	AMP-STR-CHL-NAL-TET
SAL01892	FB46-1	CL100115974_L02_550.fq.fasta	FS	Goldcoast	senterica	358	64	16	0.25	1	2	1	32	32	32	4	4	0.0625	64	0.125	5	R	I	S	S	S	S	R	R	R	S	S	S	R	S	AMP-AMC-STR-CHL-TST-TET
SAL01893	FB46-4	CL100115974_L02_551.fq.fasta	FS	Goldcoast	senterica	358	64	16	0.25	1	2	1	32	32	32	4	32	8	64	0.125	7	R	I	S	S	S	S	R	R	R	S	R	R	R	S	AMP-AMC-STR-CHL-TST-NAL-CIP-TET
SAL01895	FB29-2	CL100115974_L02_553.fq.fasta	FS	Typhimurium	senterica	19	64	16	0.5	2	4	0.5	4	64	0.5	4	8	0.25	64	0.5	3	R	I	S	S	S	S	S	R	S	S	S	I	R	S	AMP-AMC-CHL-CIP-TET
SAL01896	FB29-4	CL100115974_L02_554.fq.fasta	FS	Typhimurium	senterica	19	64	16	0.5	2	2	1	8	64	0.5	4	8	0.25	64	0.5	3	R	I	S	S	S	S	S	R	S	S	S	I	R	S	AMP-AMC-CHL-CIP-TET
SAL01897	D22-2	CL100115974_L02_556.fq.fasta	HS	Typhimurium	senterica	34	64	8	0.5	2	64	4	32	64	32	4	64	0.25	64	0.5	7	R	S	S	S	R	S	R	R	R	S	R	I	R	S	AMP-KAN-STR-CHL-TST-NAL-CIP-TET
SAL01898	D22-5	CL100115974_L02_555.fq.fasta	HS	Typhimurium	senterica	34	64	4	0.25	1	0.5	0.125	2	8	0.25	2	64	0.0625	64	0.125	3	R	S	S	S	S	S	S	S	S	S	R	S	R	S	AMP-NAL-TET
SAL01899	D3-3	CL100115974_L02_557.fq.fasta	HS	Typhimurium	senterica	34	64	16	0.5	2	64	16	16	64	32	8	64	0.25	64	32	8	R	I	S	S	R	R	I	R	R	S	R	I	R	R	AMP-AMC-KAN-GEN-STR-CHL-TST-NAL-CIP-TET-COL
SAL01900	D3-1	CL100115974_L02_558.fq.fasta	HS	Typhimurium	senterica	34	64	0.5	0.5	4	16	1	8	64	32	4	64	0.25	64	32	6	R	S	S	S	S	S	S	R	R	S	R	I	R	R	AMP-CHL-TST-NAL-CIP-TET-COL
SAL01901	D1-5	CL100115974_L02_559.fq.fasta	HS	Typhimurium	senterica	34	64	16	0.5	2	16	4	16	64	32	4	64	0.25	64	32	6	R	I	S	S	S	S	I	R	R	S	R	I	R	R	AMP-AMC-STR-CHL-TST-NAL-CIP-TET-COL
SAL01902	D21-1	CL100115974_L02_560.fq.fasta	HS	Typhimurium	senterica	34	64	16	0.5	1	64	16	16	64	32	2	64	0.0625	64	32	8	R	I	S	S	R	R	I	R	R	S	R	S	R	R	AMP-AMC-KAN-GEN-STR-CHL-TST-NAL-TET-COL
SAL01903	D28-1	CL100115974_L02_541.fq.fasta	HS	Typhimurium	senterica	34	64	16	0.125	1	64	1	16	64	32	2	64	0.0625	32	32	7	R	I	S	S	R	S	I	R	R	S	R	S	R	R	AMP-AMC-KAN-STR-CHL-TST-NAL-TET-COL
SAL01905	G17-4	CL100115975_L01_564.fq.fasta	HS	Typhimurium	senterica	19	64	16	4	4	2	1	8	64	32	8	16	0.25	64	32	5	R	I	I	S	S	S	S	R	R	S	S	I	R	R	AMP-AMC-CF-CHL-TST-CIP-TET-COL
SAL01906	G17-5	CL100115974_L02_526.fq.fasta	HS	Typhimurium	senterica	19	64	16	1	2	2	1	8	64	0.5	8	8	0.25	64	0.25	3	R	I	S	S	S	S	S	R	S	S	S	I	R	S	AMP-AMC-CHL-CIP-TET
SAL01907	G17-2	CL100115974_L02_527.fq.fasta	HS	Typhimurium	senterica	19	64	16	1	2	2	0.5	8	64	0.5	8	8	0.25	64	0.25	3	R	I	S	S	S	S	S	R	S	S	S	I	R	S	AMP-AMC-CHL-CIP-TET
SAL01908	D27-1	CL100115974_L02_528.fq.fasta	HS	Typhimurium	senterica	34	64	8	0.25	1	32	4	8	64	32	2	64	0.0625	64	0.03125	5	R	S	S	S	I	S	S	R	R	S	R	S	R	S	AMP-KAN-CHL-TST-NAL-TET
SAL01909	D27-4	CL100115974_L02_529.fq.fasta	HS	Typhimurium	senterica	34	64	8	0.25	0.5	64	16	32	64	32	2	64	0.0625	64	32	9	R	S	S	S	R	R	R	R	R	S	R	S	R	R	AMP-KAN-GEN-STR-CHL-TST-NAL-TET-COL
SAL01910	G3-3	CL100115974_L02_530.fq.fasta	CSBS	Typhimurium	senterica	34	32	4	0.5	16	64	16	32	16	4	32	64	0.25	64	0.25	8	R	S	S	I	R	R	R	I	R	R	R	I	R	S	AMP-CX-KAN-GEN-STR-CHL-TST-AZI-NAL-CIP-TET
SAL01911	FB11-4	CL100115974_L02_571.fq.fasta	FS	Typhimurium	senterica	19	64	8	0.5	2	4	1	8	64	0.25	0.5	4	2	64	0.25	4	R	S	S	S	S	S	S	R	S	S	S	R	R	S	AMP-CHL-CIP-TET
SAL01912	FB11-2	CL100115974_L02_570.fq.fasta	FS	Typhimurium	senterica	19	64	8	0.5	2	2	1	4	64	0.25	0.5	16	0.0625	64	0.25	3	R	S	S	S	S	S	S	R	S	S	S	S	R	S	AMP--CHL-TET
SAL01913	FB14-3	CL100115974_L02_561.fq.fasta	FS	Typhimurium	senterica	19	64	8	1	2	2	0.25	8	64	0.5	0.5	2	0.0625	64	0.25	3	R	S	S	S	S	S	S	R	S	S	S	S	R	S	AMP-CHL-TET
SAL01914	FB14-1	CL100115974_L02_562.fq.fasta	FS	London	senterica	155	64	8	1	1	2	0.25	64	64	32	32	64	0.0625	64	0.25	7	R	S	S	S	S	S	R	R	R	R	R	S	R	S	AMP-STR-CHL-TST-AZI-NAL-TET
SAL01916	FB48-4	CL100115974_L02_563.fq.fasta	FS	London	senterica	155	64	8	2	1	8	2	8	64	0.5	2	4	0.125	32	32	4	R	S	S	S	S	S	S	R	S	S	S	I	R	R	AMP-CHL-CIP-TET-COL
SAL01917	FB47-5	CL100115974_L02_564.fq.fasta	FS	Typhimurium	senterica	19	64	8	1	2	1	0.5	4	64	0.25	0.25	64	0.25	64	0.25	4	R	S	S	S	S	S	S	R	S	S	R	I	R	S	AMP-CHL-NAL-CIP-TET
SAL01918	FB47-1	CL100115974_L02_565.fq.fasta	FS	Typhimurium	senterica	19	64	8	0.5	2	2	0.25	4	64	0.5	0.5	64	0.0625	64	0.25	4	R	S	S	S	S	S	S	R	S	S	R	S	R	S	AMP-CHL-NAL-TET
SAL01919	FB3-1	CL100115974_L02_566.fq.fasta	FS	Typhimurium	senterica	19	64	8	0.5	1	2	0.25	4	64	0.5	0.5	64	0.0625	64	0.25	4	R	S	S	S	S	S	S	R	S	S	R	S	R	S	AMP-CHL-NAL-TET
SAL01920	FB3-2	CL100115974_L02_567.fq.fasta	FS	Typhimurium	senterica	19	64	8	0.5	1	2	0.5	4	64	0.5	0.5	64	0.0625	64	0.25	4	R	S	S	S	S	S	S	R	S	S	R	S	R	S	AMP-CHL-NAL-TET
SAL01921	FB3-3	CL100115974_L02_568.fq.fasta	FS	Typhimurium	senterica	19	64	16	0.5	1	1	0.25	16	64	32	64	64	0.0625	64	0.5	6	R	I	S	S	S	S	I	R	R	R	R	S	R	S	AMP-AMC-STR-CHL-TST-AZI-NAL-TET
SAL01922	FB3-4	CL100115974_L02_569.fq.fasta	FS	Typhimurium	senterica	19	64	8	2	1	8	1	8	64	32	2	64	0.0625	32	32	6	R	S	S	S	S	S	S	R	R	S	R	S	R	R	AMP-CHL-TST-NAL-TET-COL
SAL01923	G17-1	CL100115974_L02_574.fq.fasta	HS	Typhimurium	senterica	19	64	8	1	4	4	0.5	16	64	32	2	64	0.0625	64	32	6	R	S	S	S	S	S	I	R	R	S	R	S	R	R	AMP-STR-CHL-TST-NAL-TET-COL
SAL01924	D1-1	CL100115975_L01_565.fq.fasta	HS	Typhimurium	senterica	19	64	4	0.25	1	4	0.125	8	8	32	4	64	0.125	64	32	5	R	S	S	S	S	S	S	S	R	S	R	I	R	R	AMP-TST-NAL-CIP-TET-COL
SAL01926	G3-2	CL100115975_L01_567.fq.fasta	HS	Rissen	senterica	469	64	2	1	2	4	8	32	32	32	1	64	2	64	0.25	8	R	I	S	S	S	I	R	R	R	S	R	R	R	R	AMP-AMC-GEN-STR-CHL-TST-NAL-CIP-TET-COL
SAL01927	C15-1	CL100115974_L02_501.fq.fasta	CSAS	Typhimurium	senterica	34	64	16	128	1	16	4	64	64	32	4	64	2	8	32	9	R	I	R	S	S	S	R	R	R	S	R	R	R	R	AMP-AMC-CF-STR-CHL-TST-NAL-CIP-TET-COL
SAL01928	C15-2	CL100115974_L02_502.fq.fasta	CSAS	Typhimurium	senterica	19	64	16	128	1	64	32	64	64	32	64	8	0.125	16	32	10	R	S	R	S	R	R	R	R	R	R	S	I	R	R	AMP-CF-KAN-GEN-STR-CHL-TST-AZI-CIP-TET-COL
SAL01935	FB13-3	CL100115974_L02_545.fq.fasta	FS	Typhimurium	senterica	19	64	8	0.5	1	2	0.25	8	8	0.5	0.5	64	2	64	8	5	R	S	S	S	S	S	S	S	S	S	R	R	R	R	AMP-NAL-CIP-TET-COL
SAL01941	D28-3	CL100115974_L02_532.fq.fasta	HS	Typhimurium	senterica	34	64	4	0.25	1	0.5	0.0625	2	64	0.5	2	8	0.0625	64	0.25	3	R	S	S	S	S	S	S	R	S	S	S	S	R	S	AMP-CHL-TET
SAL01959	FB16-2	CL100115974_L02_572.fq.fasta	FS	Typhimurium	senterica	19	64	8	1	2	1	1	8	64	0.25	0.25	4	0.0625	64	0.25	3	R	S	S	S	S	S	S	R	S	S	S	S	R	S	AMP-CHL-TET
SAL01960	FB16-4	CL100115974_L02_573.fq.fasta	FS	Typhimurium	senterica	19	64	8	1	1	2	0.5	4	64	0.5	0.5	2	0.0625	32	0.5	3	R	S	S	S	S	S	S	R	S	S	S	S	R	S	AMP-CHL-TET

## Sheet: S2. ARG
															Penicillins			Cephems		Aminoglycosides										Phenicols					Trimethoprim				Sulphonamides				Macrolides					Fluoroquinolones
			Source	Serovar	SubSpecies	ST	aroC	dnaN	hemD	hisD	purE	sucA	thrA	NoofARG	Total1	blaOXA-1	blaTEM-1B	Total2	blaCTX-M-65	Total3	aac(6')-Ib-cr	aph(3')-Ia	aac(3)-Iva	aadA1	aadA17	aadA2	ant(3'')-Ia	aph(3'')-Ib	aph(6)-Id	Total4	cat	catB3	cmlA1	floR	Total5	dfrA1	dfrA12	dfrA32	Total6	sul1	sul2	sul3	Total7	ere(A)	fosA3	fosA7	mef(A)	Total8	oqxA
SAL01849	H1-2-2	CL100115974_L01_589.fq.fasta	CSAS	Typhimurium	senterica	19	10	7	12	9	5	9	2	11	1	0	1	0	0	2	0	0	0	0	0	1	1	0	0	2	0	0	1	1	1	0	1	0	2	0	1	1	0	0	0	0	0	1	0
SAL01850	H1-2-3	CL100115974_L02_590.fq.fasta	CSAS	London	senterica	155	10	60	58	66	6	65	16	0	0	0	0	0	0	0	0	0	0	0	0	0	0	0	0	0	0	0	0	0	0	0	0	0	0	0	0	0	0	0	0	0	0	0	0
SAL01851	H1-4-3	CL100115974_L02_591.fq.fasta	CSAS	Typhimurium	senterica	19	10	7	12	9	5	9	2	6	1	0	1	0	0	0	0	0	0	0	0	0	0	0	0	1	0	0	0	1	0	0	0	0	1	0	1	0	0	0	0	0	0	1	0
SAL01852	H1-4-2	CL100115974_L02_592.fq.fasta	CSAS	Typhimurium	senterica	19	10	7	12	9	5	9	2	6	1	0	1	0	0	0	0	0	0	0	0	0	0	0	0	1	0	0	0	1	0	0	0	0	1	0	1	0	0	0	0	0	0	1	0
SAL01853	H4-2-1	CL100115974_L02_593.fq.fasta	CSAS	Rissen	senterica	469	92	107	79	156	64	151	87	8	1	0	1	0	0	2	0	0	0	0	0	1	1	0	0	1	0	0	1	0	1	0	1	0	2	1	0	1	0	0	0	0	0	0	0
SAL01854	A6-1-3	CL100115974_L02_594.fq.fasta	CSBS	Typhimurium	senterica	19	10	7	12	9	5	9	2	6	1	0	1	0	0	0	0	0	0	0	0	0	0	0	0	1	0	0	0	1	0	0	0	0	1	0	1	0	0	0	0	0	0	1	0
SAL01855	D5-2-1	CL100115974_L02_595.fq.fasta	CSBS	Typhimurium	senterica	19	10	7	12	9	5	9	2	6	1	0	1	0	0	0	0	0	0	0	0	0	0	0	0	1	0	0	0	1	0	0	0	0	1	0	1	0	0	0	0	0	0	1	0
SAL01856	D5-2-2	CL100115974_L02_596.fq.fasta	CSBS	Typhimurium	senterica	19	10	7	12	9	5	9	2	6	1	0	1	0	0	0	0	0	0	0	0	0	0	0	0	1	0	0	0	1	0	0	0	0	1	0	1	0	0	0	0	0	0	1	0
SAL01857	H6-3-5	CL100115975_L01_562.fq.fasta	CSAS	Typhimurium	senterica	19	10	7	12	9	5	9	2	6	1	0	1	0	0	0	0	0	0	0	0	0	0	0	0	1	0	0	0	1	0	0	0	0	1	0	1	0	0	0	0	0	0	1	0
SAL01858	H6-3-6	CL100115974_L02_503.fq.fasta	CSAS	Rissen	senterica	469	92	107	79	156	64	151	87	8	1	0	1	0	0	2	0	0	0	0	0	1	1	0	0	1	0	0	1	0	1	0	1	0	2	1	0	1	0	0	0	0	0	0	0
SAL01859	H6-3-4	CL100115974_L02_504.fq.fasta	CSAS	Rissen	senterica	469	92	107	79	156	64	151	87	8	1	0	1	0	0	2	0	0	0	0	0	1	1	0	0	1	0	0	1	0	1	0	1	0	2	1	0	1	0	0	0	0	0	0	0
SAL01860	H1-1-1	CL100115974_L02_505.fq.fasta	CSAS	Typhimurium	senterica	19	10	7	12	9	5	9	2	6	1	0	1	0	0	0	0	0	0	0	0	0	0	0	0	1	0	0	0	1	0	0	0	0	1	0	1	0	0	0	0	0	0	1	0
SAL01861	H1-1-2	CL100115974_L02_506.fq.fasta	CSAS	Derby	senterica	40	19	20	3	20	5	22	22	9	1	0	1	0	0	2	0	0	0	0	0	0	0	1	1	0	0	0	0	0	0	0	0	0	1	0	1	0	1	0	0	1	0	3	1
SAL01862	H1-1-3	CL100115974_L02_507.fq.fasta	CSAS	Typhimurium	senterica	19	10	7	12	9	5	9	2	6	1	0	1	0	0	0	0	0	0	0	0	0	0	0	0	1	0	0	0	1	0	0	0	0	1	0	1	0	0	0	0	0	0	1	0
SAL01863	J6-3-2	CL100115974_L02_508.fq.fasta	CSAS	Typhimurium	senterica	19	10	7	12	9	5	9	2	6	1	0	1	0	0	0	0	0	0	0	0	0	0	0	0	1	0	0	0	1	0	0	0	0	1	0	1	0	0	0	0	0	0	1	0
SAL01864	刮毛6-1-1	CL100115974_L02_509.fq.fasta	CSBS	I 3,10:l,v:l,z13,z28	senterica	155	10	60	58	66	6	65	16	0	0	0	0	0	0	0	0	0	0	0	0	0	0	0	0	0	0	0	0	0	0	0	0	0	0	0	0	0	0	0	0	0	0	0	0
SAL01865	刮毛6-1-2	CL100115974_L02_510.fq.fasta	CSBS	London	senterica	155	10	60	58	66	6	65	16	0	0	0	0	0	0	0	0	0	0	0	0	0	0	0	0	0	0	0	0	0	0	0	0	0	0	0	0	0	0	0	0	0	0	0	0
SAL01866	刮毛6-1-3	CL100115974_L02_511.fq.fasta	CSBS	London	senterica	155	10	60	58	66	6	65	16	0	0	0	0	0	0	0	0	0	0	0	0	0	0	0	0	0	0	0	0	0	0	0	0	0	0	0	0	0	0	0	0	0	0	0	0
SAL01867	刮毛6-3-3	CL100115974_L02_512.fq.fasta	CSBS	London	senterica	155	10	60	58	66	6	65	16	0	0	0	0	0	0	0	0	0	0	0	0	0	0	0	0	0	0	0	0	0	0	0	0	0	0	0	0	0	0	0	0	0	0	0	0
SAL01868	刮毛5-2-6	CL100115974_L02_513.fq.fasta	CSBS	London	senterica	155	10	60	58	66	6	65	16	0	0	0	0	0	0	0	0	0	0	0	0	0	0	0	0	0	0	0	0	0	0	0	0	0	0	0	0	0	0	0	0	0	0	0	0
SAL01869	刮毛5-2-7	CL100115974_L02_514.fq.fasta	CSBS	London	senterica	155	10	60	58	66	6	65	16	0	0	0	0	0	0	0	0	0	0	0	0	0	0	0	0	0	0	0	0	0	0	0	0	0	0	0	0	0	0	0	0	0	0	0	0
SAL01870	刮毛5-2-9	CL100115974_L02_515.fq.fasta	CSBS	London	senterica	155	10	60	58	66	6	65	16	2	0	0	0	0	0	0	0	0	0	0	0	0	0	0	0	1	1	0	0	0	0	0	0	0	0	0	0	0	0	0	0	0	0	0	0
SAL01871	刮毛5-1-3	CL100115974_L02_516.fq.fasta	CSBS	London	senterica	155	10	60	58	66	6	65	16	0	0	0	0	0	0	0	0	0	0	0	0	0	0	0	0	0	0	0	0	0	0	0	0	0	0	0	0	0	0	0	0	0	0	0	0
SAL01872	刮毛5-1-1	CL100115974_L02_517.fq.fasta	CSBS	London	senterica	155	10	60	58	66	6	65	16	0	0	0	0	0	0	0	0	0	0	0	0	0	0	0	0	0	0	0	0	0	0	0	0	0	0	0	0	0	0	0	0	0	0	0	0
SAL01873	刮毛5-1-4	CL100115974_L02_519.fq.fasta	CSBS	London	senterica	155	10	60	58	66	6	65	16	0	0	0	0	0	0	0	0	0	0	0	0	0	0	0	0	0	0	0	0	0	0	0	0	0	0	0	0	0	0	0	0	0	0	0	0
SAL01874	刮毛5-1-2	CL100115974_L02_518.fq.fasta	CSBS	London	senterica	155	10	60	58	66	6	65	16	0	0	0	0	0	0	0	0	0	0	0	0	0	0	0	0	0	0	0	0	0	0	0	0	0	0	0	0	0	0	0	0	0	0	0	0
SAL01875	下水道2-3	CL100115974_L02_520.fq.fasta	SS	Rissen	senterica	469	92	107	79	156	64	151	87	10	1	0	1	0	0	2	0	0	0	0	0	1	1	0	0	2	0	0	1	1	1	0	1	0	2	0	1	1	0	0	0	0	0	1	0
SAL01876	下水道2-1	CL100115974_L02_521.fq.fasta	SS	Rissen	senterica	469	92	107	79	156	64	151	87	10	1	0	1	0	0	2	0	0	0	0	0	1	1	0	0	2	0	0	1	1	1	0	1	0	2	0	1	1	0	0	0	0	0	1	0
SAL01877	下水道2-2	CL100115974_L02_522.fq.fasta	SS	Rissen	senterica	469	92	107	79	156	64	151	87	10	1	0	1	0	0	2	0	0	0	0	0	1	1	0	0	2	0	0	1	1	1	0	1	0	2	0	1	1	0	0	0	0	0	1	0
SAL01878	下水道0-1	CL100115974_L02_523.fq.fasta	SS	Typhimurium	senterica	19	10	7	12	9	5	9	2	6	1	0	1	0	0	0	0	0	0	0	0	0	0	0	0	1	0	0	0	1	0	0	0	0	1	0	1	0	0	0	0	0	0	1	0
SAL01879	下水道0-2	CL100115974_L02_524.fq.fasta	SS	Typhimurium	senterica	19	10	7	12	9	5	9	2	6	1	0	1	0	0	0	0	0	0	0	0	0	0	0	0	1	0	0	0	1	0	0	0	0	1	0	1	0	0	0	0	0	0	1	0
SAL01880	下水道0-3	CL100115974_L02_525.fq.fasta	SS	Typhimurium	senterica	19	10	7	12	9	5	9	2	6	1	0	1	0	0	0	0	0	0	0	0	0	0	0	0	1	0	0	0	1	0	0	0	0	1	0	1	0	0	0	0	0	0	1	0
SAL01881	D5-2-3	CL100115974_L02_531.fq.fasta	CSBS	Typhimurium	senterica	19	10	7	12	9	5	9	2	6	1	0	1	0	0	0	0	0	0	0	0	0	0	0	0	1	0	0	0	1	0	0	0	0	1	0	1	0	0	0	0	0	0	1	0
SAL01882	A6-1-1	CL100115974_L02_542.fq.fasta	CSBS	Typhimurium	senterica	19	10	7	12	9	5	9	2	6	1	0	1	0	0	0	0	0	0	0	0	0	0	0	0	1	0	0	0	1	0	0	0	0	1	0	1	0	0	0	0	0	0	1	0
SAL01883	A6-2-1	CL100115975_L01_559.fq.fasta	CSBS	Typhimurium	senterica	19	10	7	12	9	5	9	2	7	1	0	1	0	0	0	0	0	0	0	0	0	0	0	0	1	0	0	0	1	0	0	0	0	1	0	1	0	0	0	0	0	0	2	0
SAL01884	A6-1-2	CL100115975_L01_560.fq.fasta	CSBS	Typhimurium	senterica	34	10	19	12	9	5	9	2	6	1	0	1	0	0	0	0	0	0	0	0	0	0	0	0	0	0	0	0	0	0	0	0	0	1	1	0	0	0	0	0	0	0	3	1
SAL01885	H1-4-1	CL100115975_L01_561.fq.fasta	CSAS	Typhimurium	senterica	34	10	19	12	9	5	9	2	5	1	0	1	0	0	0	0	0	0	0	0	0	0	0	0	0	0	0	0	0	0	0	0	0	1	1	0	0	0	0	0	0	0	2	1
SAL01886	FB40-3	CL100115974_L02_543.fq.fasta	FS	Typhimurium	senterica	19	10	7	12	9	5	9	2	6	1	0	1	0	0	0	0	0	0	0	0	0	0	0	0	1	0	0	0	1	0	0	0	0	1	0	1	0	0	0	0	0	0	1	0
SAL01887	FB13-1	CL100115974_L02_544.fq.fasta	FS	Typhimurium	senterica	19	10	7	12	9	5	9	2	6	1	0	1	0	0	0	0	0	0	0	0	0	0	0	0	1	0	0	0	1	0	0	0	0	1	0	1	0	0	0	0	0	0	1	0
SAL01890	FB12-1	CL100115974_L02_548.fq.fasta	FS	Typhimurium	senterica	19	10	7	12	9	5	9	2	5	0	0	0	0	0	1	0	0	0	0	1	0	0	0	0	0	0	0	0	0	0	0	0	0	0	0	0	0	0	0	0	0	0	2	0
SAL01891	FB12-4	CL100115974_L02_549.fq.fasta	FS	Typhimurium	senterica	19	10	7	12	9	5	9	2	10	1	0	1	0	0	1	0	0	0	0	0	0	1	0	0	2	0	0	1	1	1	0	1	0	2	0	1	1	0	0	0	0	0	1	0
SAL01892	FB46-1	CL100115974_L02_550.fq.fasta	FS	Goldcoast	senterica	358	5	110	35	122	2	19	22	11	1	0	1	0	0	2	0	0	0	0	0	1	1	0	0	2	0	0	1	1	1	0	1	0	2	0	1	1	0	0	0	0	0	1	0
SAL01893	FB46-4	CL100115974_L02_551.fq.fasta	FS	Goldcoast	senterica	358	5	110	35	122	2	19	22	12	1	0	1	0	0	2	0	0	0	0	0	1	1	0	0	2	0	0	1	1	1	0	1	0	2	0	1	1	0	0	0	0	0	2	0
SAL01895	FB29-2	CL100115974_L02_553.fq.fasta	FS	Typhimurium	senterica	19	10	7	12	9	5	9	2	6	1	0	1	0	0	0	0	0	0	0	0	0	0	0	0	1	0	0	0	1	0	0	0	0	1	0	1	0	0	0	0	0	0	1	0
SAL01896	FB29-4	CL100115974_L02_554.fq.fasta	FS	Typhimurium	senterica	19	10	7	12	9	5	9	2	6	1	0	1	0	0	0	0	0	0	0	0	0	0	0	0	1	0	0	0	1	0	0	0	0	1	0	1	0	0	0	0	0	0	1	0
SAL01897	D22-2	CL100115974_L02_556.fq.fasta	HS	Typhimurium	senterica	34	10	19	12	9	5	9	2	14	2	1	1	0	0	2	1	0	1	0	0	0	1	0	0	3	0	1	1	1	1	0	1	0	3	1	1	1	0	0	0	0	0	2	1
SAL01898	D22-5	CL100115974_L02_555.fq.fasta	HS	Typhimurium	senterica	34	10	19	12	9	5	9	2	5	1	0	1	0	0	0	0	0	0	0	0	0	0	0	0	0	0	0	0	0	0	0	0	0	1	1	0	0	0	0	0	0	0	2	1
SAL01899	D3-3	CL100115974_L02_557.fq.fasta	HS	Typhimurium	senterica	34	10	19	12	9	5	9	2	14	2	1	1	0	0	2	1	1	1	0	0	0	1	0	0	3	0	1	1	1	1	0	1	0	3	1	1	1	0	0	0	0	0	2	1
SAL01900	D3-1	CL100115974_L02_558.fq.fasta	HS	Typhimurium	senterica	34	10	19	12	9	5	9	2	4	0	0	0	0	0	0	0	0	0	0	0	0	0	0	0	0	0	0	0	0	0	0	0	0	1	1	0	0	0	0	0	0	0	2	1
SAL01901	D1-5	CL100115974_L02_559.fq.fasta	HS	Typhimurium	senterica	34	10	19	12	9	5	9	2	5	1	0	1	0	0	0	0	0	0	0	0	0	0	0	0	0	0	0	0	0	0	0	0	0	1	1	0	0	0	0	0	0	0	2	1
SAL01902	D21-1	CL100115974_L02_560.fq.fasta	HS	Typhimurium	senterica	34	10	19	12	9	5	9	2	14	2	1	1	0	0	2	1	0	1	0	0	0	1	0	0	3	0	1	1	1	1	0	1	0	3	1	1	1	0	0	0	0	0	2	1
SAL01903	D28-1	CL100115974_L02_541.fq.fasta	HS	Typhimurium	senterica	34	10	19	12	9	5	9	2	15	1	1	0	0	0	3	1	0	0	0	0	1	0	1	1	3	1	1	0	1	1	0	0	1	2	1	1	0	1	1	0	0	0	2	1
SAL01905	G17-4	CL100115975_L01_564.fq.fasta	HS	Typhimurium	senterica	19	10	7	12	9	5	9	2	6	1	0	1	0	0	0	0	0	0	0	0	0	0	0	0	1	0	0	0	1	0	0	0	0	1	0	1	0	0	0	0	0	0	1	0
SAL01906	G17-5	CL100115974_L02_526.fq.fasta	HS	Typhimurium	senterica	19	10	7	12	9	5	9	2	6	1	0	1	0	0	0	0	0	0	0	0	0	0	0	0	1	0	0	0	1	0	0	0	0	1	0	1	0	0	0	0	0	0	1	0
SAL01907	G17-2	CL100115974_L02_527.fq.fasta	HS	Typhimurium	senterica	19	10	7	12	9	5	9	2	6	1	0	1	0	0	0	0	0	0	0	0	0	0	0	0	1	0	0	0	1	0	0	0	0	1	0	1	0	0	0	0	0	0	1	0
SAL01908	D27-1	CL100115974_L02_528.fq.fasta	HS	Typhimurium	senterica	34	10	19	12	9	5	9	2	5	1	0	1	0	0	0	0	0	0	0	0	0	0	0	0	0	0	0	0	0	0	0	0	0	1	1	0	0	0	0	0	0	0	2	1
SAL01909	D27-4	CL100115974_L02_529.fq.fasta	HS	Typhimurium	senterica	34	10	19	12	9	5	9	2	15	2	1	1	0	0	3	1	1	1	0	0	1	1	0	0	3	0	1	1	1	1	0	1	0	3	1	1	1	0	0	0	0	0	2	1
SAL01910	G3-3	CL100115974_L02_530.fq.fasta	CSBS	Typhimurium	senterica	34	10	19	12	9	5	9	2	21	1	1	0	1	1	5	1	0	1	0	0	1	1	1	1	3	1	1	0	1	2	1	0	1	2	1	1	0	2	1	1	0	0	2	1
SAL01911	FB11-4	CL100115974_L02_571.fq.fasta	FS	Typhimurium	senterica	19	10	7	12	9	5	9	2	10	1	0	1	0	0	1	0	0	0	1	0	0	0	0	0	2	0	0	1	1	1	0	1	0	1	0	1	0	0	0	0	0	0	2	0
SAL01912	FB11-2	CL100115974_L02_570.fq.fasta	FS	Typhimurium	senterica	19	10	7	12	9	5	9	2	6	1	0	1	0	0	0	0	0	0	0	0	0	0	0	0	1	0	0	0	1	0	0	0	0	1	0	1	0	0	0	0	0	0	1	0
SAL01913	FB14-3	CL100115974_L02_561.fq.fasta	FS	Typhimurium	senterica	19	10	7	12	9	5	9	2	6	1	0	1	0	0	0	0	0	0	0	0	0	0	0	0	1	0	0	0	1	0	0	0	0	1	0	1	0	0	0	0	0	0	1	0
SAL01914	FB14-1	CL100115974_L02_562.fq.fasta	FS	London	senterica	155	10	60	58	66	6	65	16	0	0	0	0	0	0	0	0	0	0	0	0	0	0	0	0	0	0	0	0	0	0	0	0	0	0	0	0	0	0	0	0	0	0	0	0
SAL01916	FB48-4	CL100115974_L02_563.fq.fasta	FS	London	senterica	155	10	60	58	66	6	65	16	0	0	0	0	0	0	0	0	0	0	0	0	0	0	0	0	0	0	0	0	0	0	0	0	0	0	0	0	0	0	0	0	0	0	0	0
SAL01917	FB47-5	CL100115974_L02_564.fq.fasta	FS	Typhimurium	senterica	19	10	7	12	9	5	9	2	6	1	0	1	0	0	0	0	0	0	0	0	0	0	0	0	1	0	0	0	1	0	0	0	0	1	0	1	0	0	0	0	0	0	1	0
SAL01918	FB47-1	CL100115974_L02_565.fq.fasta	FS	Typhimurium	senterica	19	10	7	12	9	5	9	2	6	1	0	1	0	0	0	0	0	0	0	0	0	0	0	0	1	0	0	0	1	0	0	0	0	1	0	1	0	0	0	0	0	0	1	0
SAL01919	FB3-1	CL100115974_L02_566.fq.fasta	FS	Typhimurium	senterica	19	10	7	12	9	5	9	2	10	1	0	1	0	0	0	0	0	0	0	0	0	0	0	0	1	0	0	0	1	0	0	0	0	2	1	1	0	0	0	0	0	0	3	1
SAL01920	FB3-2	CL100115974_L02_567.fq.fasta	FS	Typhimurium	senterica	19	10	7	12	9	5	9	2	6	1	0	1	0	0	0	0	0	0	0	0	0	0	0	0	1	0	0	0	1	0	0	0	0	1	0	1	0	0	0	0	0	0	1	0
SAL01921	FB3-3	CL100115974_L02_568.fq.fasta	FS	Typhimurium	senterica	19	10	7	12	9	5	9	2	6	1	0	1	0	0	0	0	0	0	0	0	0	0	0	0	1	0	0	0	1	0	0	0	0	1	0	1	0	0	0	0	0	0	1	0
SAL01922	FB3-4	CL100115974_L02_569.fq.fasta	FS	Typhimurium	senterica	19	10	7	12	9	5	9	2	6	1	0	1	0	0	0	0	0	0	0	0	0	0	0	0	1	0	0	0	1	0	0	0	0	1	0	1	0	0	0	0	0	0	1	0
SAL01923	G17-1	CL100115974_L02_574.fq.fasta	HS	Typhimurium	senterica	19	10	7	12	9	5	9	2	6	1	0	1	0	0	0	0	0	0	0	0	0	0	0	0	1	0	0	0	1	0	0	0	0	1	0	1	0	0	0	0	0	0	1	0
SAL01924	D1-1	CL100115975_L01_565.fq.fasta	HS	Typhimurium	senterica	19	10	7	12	9	5	9	2	7	1	0	1	0	0	0	0	0	0	0	0	0	0	0	0	1	0	0	0	1	0	0	0	0	1	0	1	0	1	0	0	0	1	1	0
SAL01926	G3-2	CL100115975_L01_567.fq.fasta	HS	Rissen	senterica	469	92	107	79	156	64	151	87	8	1	0	1	0	0	2	0	0	0	0	0	1	1	0	0	1	0	0	1	0	1	0	1	0	2	1	0	1	0	0	0	0	0	0	0
SAL01927	C15-1	CL100115974_L02_501.fq.fasta	CSAS	Typhimurium	senterica	34	10	19	12	9	5	9	2	4	0	0	0	0	0	0	0	0	0	0	0	0	0	0	0	0	0	0	0	0	0	0	0	0	1	1	0	0	0	0	0	0	0	2	1
SAL01928	C15-2	CL100115974_L02_502.fq.fasta	CSAS	Typhimurium	senterica	19	10	7	12	9	5	9	2	21	1	1	0	1	1	5	1	0	1	0	0	1	1	1	1	3	1	1	0	1	2	1	0	1	2	1	1	0	2	1	1	0	0	1	0
SAL01935	FB13-3	CL100115974_L02_545.fq.fasta	FS	Typhimurium	senterica	19	10	7	12	9	5	9	2	7	1	0	1	0	0	0	0	0	0	0	0	0	0	0	0	1	0	0	0	1	0	0	0	0	1	0	1	0	0	0	0	0	0	2	0
SAL01941	D28-3	CL100115974_L02_532.fq.fasta	HS	Typhimurium	senterica	34	10	19	12	9	5	9	2	5	1	0	1	0	0	0	0	0	0	0	0	0	0	0	0	0	0	0	0	0	0	0	0	0	1	1	0	0	0	0	0	0	0	2	1
SAL01959	FB16-2	CL100115974_L02_572.fq.fasta	FS	Typhimurium	senterica	19	10	7	12	9	5	9	2	6	1	0	1	0	0	0	0	0	0	0	0	0	0	0	0	1	0	0	0	1	0	0	0	0	1	0	1	0	0	0	0	0	0	1	0
SAL01960	FB16-4	CL100115974_L02_573.fq.fasta	FS	Typhimurium	senterica	19	10	7	12	9	5	9	2	6	1	0	1	0	0	0	0	0	0	0	0	0	0	0	0	1	0	0	0	1	0	0	0	0	1	0	1	0	0	0	0	0	0	1	0
[truncated: 9 more columns]

## Sheet: S3. VFDB
VFDB					NUM_FOUND	Magnesium uptake		Macrophage inducible genes	Nonfimbrial adherence determinants				Stress adaptation	Toxin	Fimbrial adherence determinants																				Secretion system
						Mg2+ transport		Mig-14	MisL	ratB	ShdA	sinH	SodCI	Typhoid toxin	Agf/Csg							FIM					Lpf					Ste			TTSS (SPI-1 encode)
		Source	Serovar	ST		mgtB	mgtC	mig-14	misL	ratB	shdA	sinH	sodCI	cdtB	csgA	csgB	csgC	csgD	csgE	csgF	csgG	fimC	fimD	fimF	fimH	fimI	lpfA	lpfB	lpfC	lpfD	lpfE	steA	steB	steC	invA	invB	invC	invE	invF	invG	invH	invI	invJ	orgA	orgB	orgC	prgH	prgI	prgJ
SAL01882	A6-1-1	CSBS	Typhimurium	19	101	1	1	1	1	1	0	1	1	0	1	1	1	1	1	1	1	1	1	1	1	1	1	1	1	1	1	1	1	1	1	1	1	1	1	1	1	1	1	1	1	1	1	1	1
SAL01884	A6-1-2	CSBS	Typhimurium	34	101	1	1	1	1	1	0	1	1	0	1	1	1	1	1	1	1	1	1	1	1	1	1	1	1	1	1	1	1	1	1	1	1	1	1	1	1	1	1	1	1	1	1	1	1
SAL01854	A6-1-3	CSBS	Typhimurium	19	102	1	1	1	1	1	1	1	1	0	1	1	1	1	1	1	1	1	1	1	1	1	1	1	1	1	1	1	1	1	1	1	1	1	1	1	1	1	1	1	1	1	1	1	1
SAL01883	A6-2-1	CSBS	Typhimurium	19	102	1	1	1	1	1	1	1	1	0	1	1	1	1	1	1	1	1	1	1	1	1	1	1	1	1	1	1	1	1	1	1	1	1	1	1	1	1	1	1	1	1	1	1	1
SAL01927	C15-1	CSAS	Typhimurium	34	102	1	1	1	1	1	0	1	1	0	1	1	1	1	1	1	1	1	1	1	1	1	1	1	1	1	1	1	1	1	1	1	1	1	1	1	1	1	1	1	1	1	1	1	1
SAL01928	C15-2	CSAS	Typhimurium	19	101	1	1	1	1	1	0	1	1	0	1	1	1	1	1	1	1	1	1	1	1	1	1	1	1	1	1	1	1	1	1	1	1	1	1	1	1	1	1	1	1	1	1	1	1
SAL01924	D1-1	HS	Typhimurium	19	102	1	1	1	1	1	0	1	1	0	1	1	1	1	1	1	1	1	1	1	1	1	1	1	1	1	1	1	1	1	1	1	1	1	1	1	1	1	1	1	1	1	1	1	1
SAL01902	D21-1	HS	Typhimurium	34	102	1	1	1	1	1	0	1	1	0	1	1	1	1	1	1	1	1	1	1	1	1	1	1	1	1	1	1	1	1	1	1	1	1	1	1	1	1	1	1	1	1	1	1	1
SAL01897	D22-2	HS	Typhimurium	34	102	1	1	1	1	1	0	1	1	0	1	1	1	1	1	1	1	1	1	1	1	1	1	1	1	1	1	1	1	1	1	1	1	1	1	1	1	1	1	1	1	1	1	1	1
SAL01898	D22-5	HS	Typhimurium	34	102	1	1	1	1	1	0	1	1	0	1	1	1	1	1	1	1	1	1	1	1	1	1	1	1	1	1	1	1	1	1	1	1	1	1	1	1	1	1	1	1	1	1	1	1
SAL01908	D27-1	HS	Typhimurium	34	102	1	1	1	1	1	0	1	1	0	1	1	1	1	1	1	1	1	1	1	1	1	1	1	1	1	1	1	1	1	1	1	1	1	1	1	1	1	1	1	1	1	1	1	1
SAL01909	D27-4	HS	Typhimurium	34	102	1	1	1	1	1	0	1	1	0	1	1	1	1	1	1	1	1	1	1	1	1	1	1	1	1	1	1	1	1	1	1	1	1	1	1	1	1	1	1	1	1	1	1	1
SAL01903	D28-1	HS	Typhimurium	34	102	1	1	1	1	1	0	1	1	0	1	1	1	1	1	1	1	1	1	1	1	1	1	1	1	1	1	1	1	1	1	1	1	1	1	1	1	1	1	1	1	1	1	1	1
SAL01941	D28-3	HS	Typhimurium	34	102	1	1	1	1	1	0	1	1	0	1	1	1	1	1	1	1	1	1	1	1	1	1	1	1	1	1	1	1	1	1	1	1	1	1	1	1	1	1	1	1	1	1	1	1
SAL01900	D3-1	HS	Typhimurium	34	102	1	1	1	1	1	0	1	1	0	1	1	1	1	1	1	1	1	1	1	1	1	1	1	1	1	1	1	1	1	1	1	1	1	1	1	1	1	1	1	1	1	1	1	1
SAL01899	D3-3	HS	Typhimurium	34	102	1	1	1	1	1	0	1	1	0	1	1	1	1	1	1	1	1	1	1	1	1	1	1	1	1	1	1	1	1	1	1	1	1	1	1	1	1	1	1	1	1	1	1	1
SAL01855	D5-2-1	CSBS	Typhimurium	19	101	1	1	1	1	1	0	1	1	0	1	1	1	1	1	1	1	1	1	1	1	1	1	1	1	1	1	1	1	1	1	1	1	1	1	1	1	1	1	1	1	1	1	1	1
SAL01856	D5-2-2	CSBS	Typhimurium	19	101	1	1	1	1	1	0	1	1	0	1	1	1	1	1	1	1	1	1	1	1	1	1	1	1	1	1	1	1	1	1	1	1	1	1	1	1	1	1	1	1	1	1	1	1
SAL01881	D5-2-3	CSBS	Typhimurium	19	101	1	1	1	1	1	0	1	1	0	1	1	1	1	1	1	1	1	1	1	1	1	1	1	1	1	1	1	1	1	1	1	1	1	1	1	1	1	1	1	1	1	1	1	1
SAL01901	D1-5	HS	Typhimurium	34	102	1	1	1	1	1	0	1	1	0	1	1	1	1	1	1	1	1	1	1	1	1	1	1	1	1	1	1	1	1	1	1	1	1	1	1	1	1	1	1	1	1	1	1	1
SAL01912	FB11-2	FS	Typhimurium	19	101	1	1	1	1	1	0	1	1	0	1	1	1	1	1	1	1	1	1	1	1	1	1	1	1	1	1	1	1	1	1	1	1	1	1	1	1	1	1	1	1	1	1	1	1
SAL01911	FB11-4	FS	Typhimurium	19	101	1	1	1	1	1	0	1	1	0	1	1	1	1	1	1	1	1	1	1	1	1	1	1	1	1	1	1	1	1	1	1	1	1	1	1	1	1	1	1	1	1	1	1	1
SAL01890	FB12-1	FS	Typhimurium	19	101	1	1	1	1	1	0	1	1	0	1	1	1	1	1	1	1	1	1	1	1	1	1	1	1	1	1	1	1	1	1	1	1	1	1	1	1	1	1	1	1	1	1	1	1
SAL01891	FB12-4	FS	Typhimurium	19	102	1	1	1	1	1	0	1	1	1	1	1	1	1	1	1	1	1	1	1	1	1	1	1	1	1	1	1	1	1	1	1	1	1	1	1	1	1	1	1	1	1	1	1	1
SAL01887	FB13-1	FS	Typhimurium	19	101	1	1	1	1	1	0	1	1	0	1	1	1	1	1	1	1	1	1	1	1	1	1	1	1	1	1	1	1	1	1	1	1	1	1	1	1	1	1	1	1	1	1	1	1
SAL01935	FB13-3	FS	Typhimurium	19	101	1	1	1	1	1	0	1	1	0	1	1	1	1	1	1	1	1	1	1	1	1	1	1	1	1	1	1	1	1	1	1	1	1	1	1	1	1	1	1	1	1	1	1	1
SAL01913	FB14-3	FS	Typhimurium	19	101	1	1	1	1	1	0	1	1	0	1	1	1	1	1	1	1	1	1	1	1	1	1	1	1	1	1	1	1	1	1	1	1	1	1	1	1	1	1	1	1	1	1	1	1
SAL01959	FB16-2	FS	Typhimurium	19	101	1	1	1	1	1	0	1	1	0	1	1	1	1	1	1	1	1	1	1	1	1	1	1	1	1	1	1	1	1	1	1	1	1	1	1	1	1	1	1	1	1	1	1	1
SAL01960	FB16-4	FS	Typhimurium	19	101	1	1	1	1	1	0	1	1	0	1	1	1	1	1	1	1	1	1	1	1	1	1	1	1	1	1	1	1	1	1	1	1	1	1	1	1	1	1	1	1	1	1	1	1
SAL01895	FB29-2	FS	Typhimurium	19	102	1	1	1	1	1	1	1	1	0	1	1	1	1	1	1	1	1	1	1	1	1	1	1	1	1	1	1	1	1	1	1	1	1	1	1	1	1	1	1	1	1	1	1	1
SAL01896	FB29-4	FS	Typhimurium	19	102	1	1	1	1	1	1	1	1	0	1	1	1	1	1	1	1	1	1	1	1	1	1	1	1	1	1	1	1	1	1	1	1	1	1	1	1	1	1	1	1	1	1	1	1
SAL01919	FB3-1	FS	Typhimurium	19	102	1	1	1	1	1	0	1	1	0	1	1	1	1	1	1	1	1	1	1	1	1	1	1	1	1	1	1	1	1	1	1	1	1	1	1	1	1	1	1	1	1	1	1	1
SAL01920	FB3-2	FS	Typhimurium	19	101	1	1	1	1	1	0	1	1	0	1	1	1	1	1	1	1	1	1	1	1	1	1	1	1	1	1	1	1	1	1	1	1	1	1	1	1	1	1	1	1	1	1	1	1
SAL01921	FB3-3	FS	Typhimurium	19	101	1	1	1	1	1	0	1	1	0	1	1	1	1	1	1	1	1	1	1	1	1	1	1	1	1	1	1	1	1	1	1	1	1	1	1	1	1	1	1	1	1	1	1	1
SAL01922	FB3-4	FS	Typhimurium	19	101	1	1	1	1	1	0	1	1	0	1	1	1	1	1	1	1	1	1	1	1	1	1	1	1	1	1	1	1	1	1	1	1	1	1	1	1	1	1	1	1	1	1	1	1
SAL01886	FB40-3	FS	Typhimurium	19	102	1	1	1	1	1	1	1	1	0	1	1	1	1	1	1	1	1	1	1	1	1	1	1	1	1	1	1	1	1	1	1	1	1	1	1	1	1	1	1	1	1	1	1	1
SAL01892	FB46-1	FS	Goldcoast	358	89	1	1	1	1	0	0	1	0	1	1	1	1	1	1	1	1	1	1	1	1	1	0	0	0	0	0	0	1	1	1	1	1	1	1	1	1	1	1	1	1	1	1	1	1
SAL01893	FB46-4	FS	Goldcoast	358	89	1	1	1	1	0	0	1	0	1	1	1	1	1	1	1	1	1	1	1	1	1	0	0	0	0	0	0	1	1	1	1	1	1	1	1	1	1	1	1	1	1	1	1	1
SAL01918	FB47-1	FS	Typhimurium	19	101	1	1	1	1	1	0	1	1	0	1	1	1	1	1	1	1	1	1	1	1	1	1	1	1	1	1	1	1	1	1	1	1	1	1	1	1	1	1	1	1	1	1	1	1
SAL01917	FB47-5	FS	Typhimurium	19	101	1	1	1	1	1	0	1	1	0	1	1	1	1	1	1	1	1	1	1	1	1	1	1	1	1	1	1	1	1	1	1	1	1	1	1	1	1	1	1	1	1	1	1	1
SAL01914	FB14-1	FS	London	155	101	1	1	1	1	1	0	1	1	0	1	1	1	1	1	1	1	1	1	1	1	1	1	1	1	1	1	1	1	1	1	1	1	1	1	1	1	1	1	1	1	1	1	1	1
SAL01916	FB48-4	FS	London	155	101	1	1	1	1	1	0	1	1	0	1	1	1	1	1	1	1	1	1	1	1	1	1	1	1	1	1	1	1	1	1	1	1	1	1	1	1	1	1	1	1	1	1	1	1
SAL01923	G17-1	HS	Typhimurium	19	102	1	1	1	1	1	1	1	1	0	1	1	1	1	1	1	1	1	1	1	1	1	1	1	1	1	1	1	1	1	1	1	1	1	1	1	1	1	1	1	1	1	1	1	1
SAL01907	G17-2	HS	Typhimurium	19	102	1	1	1	1	1	1	1	1	0	1	1	1	1	1	1	1	1	1	1	1	1	1	1	1	1	1	1	1	1	1	1	1	1	1	1	1	1	1	1	1	1	1	1	1
SAL01905	G17-4	HS	Typhimurium	19	101	1	1	1	1	1	0	1	1	0	1	1	1	1	1	1	1	1	1	1	1	1	1	1	1	1	1	1	1	1	1	1	1	1	1	1	1	1	1	1	1	1	1	1	1
SAL01906	G17-5	HS	Typhimurium	19	101	1	1	1	1	1	0	1	1	0	1	1	1	1	1	1	1	1	1	1	1	1	1	1	1	1	1	1	1	1	1	1	1	1	1	1	1	1	1	1	1	1	1	1	1
SAL01926	G3-2	HS	Rissen	469	103	1	1	1	1	1	1	1	1	0	1	1	1	1	1	1	1	1	1	1	1	1	1	1	1	1	1	1	1	1	1	1	1	1	1	1	1	1	1	1	1	1	1	1	1
SAL01910	G3-3	CSBS	Typhimurium	34	102	1	1	1	1	1	0	1	1	0	1	1	1	1	1	1	1	1	1	1	1	1	1	1	1	1	1	1	1	1	1	1	1	1	1	1	1	1	1	1	1	1	1	1	1
SAL01860	H1-1-1	CSAS	Typhimurium	19	101	1	1	1	1	1	0	1	1	0	1	1	1	1	1	1	1	1	1	1	1	1	1	1	1	1	1	1	1	1	1	1	1	1	1	1	1	1	1	1	1	1	1	1	1
SAL01861	H1-1-2	CSAS	Derby	40	88	1	1	1	1	0	0	1	0	0	1	1	1	1	1	1	1	1	1	1	1	1	0	0	0	0	0	0	0	1	1	1	1	1	1	1	1	1	1	1	1	1	1	1	1
SAL01862	H1-1-3	CSAS	Typhimurium	19	101	1	1	1	1	1	0	1	1	0	1	1	1	1	1	1	1	1	1	1	1	1	1	1	1	1	1	1	1	1	1	1	1	1	1	1	1	1	1	1	1	1	1	1	1
SAL01849	H1-2-2	CSAS	Typhimurium	19	102	1	1	1	1	1	1	1	1	0	1	1	1	1	1	1	1	1	1	1	1	1	1	1	1	1	1	1	1	1	1	1	1	1	1	1	1	1	1	1	1	1	1	1	1
SAL01850	H1-2-3	CSAS	London	155	101	1	1	1	1	1	0	1	1	0	1	1	1	1	1	1	1	1	1	1	1	1	1	1	1	1	1	1	1	1	1	1	1	1	1	1	1	1	1	1	1	1	1	1	1
SAL01885	H1-4-1	CSAS	Typhimurium	34	101	1	1	1	1	1	0	1	1	0	1	1	1	1	1	1	1	1	1	1	1	1	1	1	1	1	1	1	1	1	1	1	1	1	1	1	1	1	1	1	1	1	1	1	1
SAL01852	H1-4-2	CSAS	Typhimurium	19	101	1	1	1	1	1	0	1	1	0	1	1	1	1	1	1	1	1	1	1	1	1	1	1	1	1	1	1	1	1	1	1	1	1	1	1	1	1	1	1	1	1	1	1	1
SAL01851	H1-4-3	CSAS	Typhimurium	19	101	1	1	1	1	1	0	1	1	0	1	1	1	1	1	1	1	1	1	1	1	1	1	1	1	1	1	1	1	1	1	1	1	1	1	1	1	1	1	1	1	1	1	1	1
SAL01853	H4-2-1	CSAS	Rissen	469	91	1	1	1	1	0	0	1	0	0	1	1	1	1	1	1	1	1	1	1	1	1	1	1	1	0	1	0	1	1	1	1	1	1	1	1	1	1	1	1	1	1	1	1	1
SAL01859	H6-3-4	CSAS	Rissen	469	91	1	1	1	1	0	0	1	0	0	1	1	1	1	1	1	1	1	1	1	1	1	1	1	1	0	1	0	1	1	1	1	1	1	1	1	1	1	1	1	1	1	1	1	1
SAL01857	H6-3-5	CSAS	Typhimurium	19	91	1	1	1	1	0	0	1	0	0	1	1	1	1	1	1	1	1	1	1	1	1	1	1	1	0	1	0	1	1	1	1	1	1	1	1	1	1	1	1	1	1	1	1	1
SAL01858	H6-3-6	CSAS	Rissen	469	91	1	1	1	1	0	0	1	0	0	1	1	1	1	1	1	1	1	1	1	1	1	1	1	1	0	1	0	1	1	1	1	1	1	1	1	1	1	1	1	1	1	1	1	1
SAL01863	J6-3-2	CSAS	Typhimurium	19	101	1	1	1	1	1	0	1	1	0	1	1	1	1	1	1	1	1	1	1	1	1	1	1	1	1	1	1	1	1	1	1	1	1	1	1	1	1	1	1	1	1	1	1	1
SAL01872	刮毛5-1-1	CSBS	London	155	101	1	1	1	1	1	0	1	1	0	1	1	1	1	1	1	1	1	1	1	1	1	1	1	1	1	1	1	1	1	1	1	1	1	1	1	1	1	1	1	1	1	1	1	1
SAL01874	刮毛5-1-2	CSBS	London	155	101	1	1	1	1	1	0	1	1	0	1	1	1	1	1	1	1	1	1	1	1	1	1	1	1	1	1	1	1	1	1	1	1	1	1	1	1	1	1	1	1	1	1	1	1
SAL01871	刮毛5-1-3	CSBS	London	155	101	1	1	1	1	1	0	1	1	0	1	1	1	1	1	1	1	1	1	1	1	1	1	1	1	1	1	1	1	1	1	1	1	1	1	1	1	1	1	1	1	1	1	1	1
SAL01873	刮毛5-1-4	CSBS	London	155	101	1	1	1	1	1	0	1	1	0	1	1	1	1	1	1	1	1	1	1	1	1	1	1	1	1	1	1	1	1	1	1	1	1	1	1	1	1	1	1	1	1	1	1	1
SAL01868	刮毛5-2-6	CSBS	London	155	101	1	1	1	1	1	0	1	1	0	1	1	1	1	1	1	1	1	1	1	1	1	1	1	1	1	1	1	1	1	1	1	1	1	1	1	1	1	1	1	1	1	1	1	1
SAL01869	刮毛5-2-7	CSBS	London	155	101	1	1	1	1	1	0	1	1	0	1	1	1	1	1	1	1	1	1	1	1	1	1	1	1	1	1	1	1	1	1	1	1	1	1	1	1	1	1	1	1	1	1	1	1
SAL01870	刮毛5-2-9	CSBS	London	155	101	1	1	1	1	1	0	1	1	0	1	1	1	1	1	1	1	1	1	1	1	1	1	1	1	1	1	1	1	1	1	1	1	1	1	1	1	1	1	1	1	1	1	1	1
SAL01864	刮毛6-1-1	CSBS	London	155	113	1	1	1	1	1	0	1	1	0	1	1	1	1	1	1	1	1	1	1	1	1	1	1	1	1	1	1	1	1	1	1	1	1	1	1	1	1	1	1	1	1	1	1	1
SAL01865	刮毛6-1-2	CSBS	London	155	101	1	1	1	1	1	0	1	1	0	1	1	1	1	1	1	1	1	1	1	1	1	1	1	1	1	1	1	1	1	1	1	1	1	1	1	1	1	1	1	1	1	1	1	1
SAL01866	刮毛6-1-3	CSBS	London	155	101	1	1	1	1	1	0	1	1	0	1	1	1	1	1	1	1	1	1	1	1	1	1	1	1	1	1	1	1	1	1	1	1	1	1	1	1	1	1	1	1	1	1	1	1
SAL01867	刮毛6-3-3	CSBS	London	155	101	1	1	1	1	1	0	1	1	0	1	1	1	1	1	1	1	1	1	1	1	1	1	1	1	1	1	1	1	1	1	1	1	1	1	1	1	1	1	1	1	1	1	1	1
SAL01878	下水道0-1	SS	Typhimurium	19	101	1	1	1	1	1	0	1	1	0	1	1	1	1	1	1	1	1	1	1	1	1	1	1	1	1	1	1	1	1	1	1	1	1	1	1	1	1	1	1	1	1	1	1	1
SAL01879	下水道0-2	SS	Typhimurium	19	102	1	1	1	1	1	1	1	1	0	1	1	1	1	1	1	1	1	1	1	1	1	1	1	1	1	1	1	1	1	1	1	1	1	1	1	1	1	1	1	1	1	1	1	1
SAL01880	下水道0-3	SS	Typhimurium	19	101	1	1	1	1	1	0	1	1	0	1	1	1	1	1	1	1	1	1	1	1	1	1	1	1	1	1	1	1	1	1	1	1	1	1	1	1	1	1	1	1	1	1	1	1
SAL01876	下水道2-1	SS	Rissen	469	91	1	1	1	1	0	0	1	0	0	1	1	1	1	1	1	1	1	1	1	1	1	1	1	1	0	1	0	1	1	1	1	1	1	1	1	1	1	1	1	1	1	1	1	1
SAL01877	下水道2-2	SS	Rissen	469	91	1	1	1	1	0	0	1	0	0	1	1	1	1	1	1	1	1	1	1	1	1	1	1	1	0	1	0	1	1	1	1	1	1	1	1	1	1	1	1	1	1	1	1	1
SAL01875	下水道2-3	SS	Rissen	469	91	1	1	1	1	0	0	1	0	0	1	1	1	1	1	1	1	1	1	1	1	1	1	1	1	0	1	0	1	1	1	1	1	1	1	1	1	1	1	1	1	1	1	1	1
[truncated: 73 more columns]

## Sheet: S4. Plasmid
						Plasmid Replicons
		Source	Serovar	ST	NUM_FOUND	Col(BS512)_1	Col3M_1	IncFIA(HI1)_1_HI1	IncHI1A_1	IncHI1B(R27)_1_R27	IncHI2A_1	IncHI2_1	IncN_1	IncX1_1
SAL01882	A6-1-1	CSBS	Typhimurium	19	0	0	0	0	0	0	0	0	0	0
SAL01884	A6-1-2	CSBS	Typhimurium	34	0	0	0	0	0	0	0	0	0	0
SAL01854	A6-1-3	CSBS	Typhimurium	19	0	0	0	0	0	0	0	0	0	0
SAL01883	A6-2-1	CSBS	Typhimurium	19	0	0	0	0	0	0	0	0	0	0
SAL01927	C15-1	CSAS	Typhimurium	34	2	0	0	0	0	0	1	1	0	0
SAL01928	C15-2	CSAS	Typhimurium	19	0	0	0	0	0	0	0	0	0	0
SAL01924	D1-1	HS	Typhimurium	19	1	0	0	0	0	0	1	0	0	0
SAL01902	D21-1	HS	Typhimurium	34	2	0	0	0	0	0	1	1	0	0
SAL01897	D22-2	HS	Typhimurium	34	2	0	0	0	0	0	1	1	0	0
SAL01898	D22-5	HS	Typhimurium	34	1	0	0	0	0	0	1	0	0	0
SAL01908	D27-1	HS	Typhimurium	34	1	0	0	0	0	0	1	0	0	0
SAL01909	D27-4	HS	Typhimurium	34	1	0	0	0	0	0	1	0	0	0
SAL01903	D28-1	HS	Typhimurium	34	2	0	0	0	0	0	1	1	0	0
SAL01941	D28-3	HS	Typhimurium	34	1	0	0	0	0	0	1	0	0	0
SAL01900	D3-1	HS	Typhimurium	34	2	0	0	0	0	0	1	1	0	0
SAL01899	D3-3	HS	Typhimurium	34	1	0	0	0	0	0	1	0	0	0
SAL01855	D5-2-1	CSBS	Typhimurium	19	0	0	0	0	0	0	0	0	0	0
SAL01856	D5-2-2	CSBS	Typhimurium	19	0	0	0	0	0	0	0	0	0	0
SAL01881	D5-2-3	CSBS	Typhimurium	19	0	0	0	0	0	0	0	0	0	0
SAL01901	D1-5	HS	Typhimurium	34	1	0	0	0	0	0	1	0	0	0
SAL01912	FB11-2	FS	Typhimurium	19	0	0	0	0	0	0	0	0	0	0
SAL01911	FB11-4	FS	Typhimurium	19	1	0	1	0	0	0	0	0	0	0
SAL01890	FB12-1	FS	Typhimurium	19	1	0	1	0	0	0	0	0	0	0
SAL01891	FB12-4	FS	Typhimurium	19	2	0	0	1	1	0	0	0	0	0
SAL01887	FB13-1	FS	Typhimurium	19	0	0	0	0	0	0	0	0	0	0
SAL01935	FB13-3	FS	Typhimurium	19	0	0	0	0	0	0	0	0	0	0
SAL01913	FB14-3	FS	Typhimurium	19	0	0	0	0	0	0	0	0	0	0
SAL01959	FB16-2	FS	Typhimurium	19	0	0	0	0	0	0	0	0	0	0
SAL01960	FB16-4	FS	Typhimurium	19	0	0	0	0	0	0	0	0	0	0
SAL01895	FB29-2	FS	Typhimurium	19	0	0	0	0	0	0	0	0	0	0
SAL01896	FB29-4	FS	Typhimurium	19	0	0	0	0	0	0	0	0	0	0
SAL01919	FB3-1	FS	Typhimurium	19	3	0	1	0	0	0	1	1	0	0
SAL01920	FB3-2	FS	Typhimurium	19	0	0	0	0	0	0	0	0	0	0
SAL01921	FB3-3	FS	Typhimurium	19	0	0	0	0	0	0	0	0	0	0
SAL01922	FB3-4	FS	Typhimurium	19	0	0	0	0	0	0	0	0	0	0
SAL01886	FB40-3	FS	Typhimurium	19	0	0	0	0	0	0	0	0	0	0
SAL01892	FB46-1	FS	Goldcoast	358	3	0	0	1	1	1	0	0	0	0
SAL01893	FB46-4	FS	Goldcoast	358	4	0	1	1	1	1	0	0	0	0
SAL01918	FB47-1	FS	Typhimurium	19	0	0	0	0	0	0	0	0	0	0
SAL01917	FB47-5	FS	Typhimurium	19	0	0	0	0	0	0	0	0	0	0
SAL01914	FB14-1	FS	London	155	1	0	0	0	0	0	0	0	0	1
SAL01916	FB48-4	FS	London	155	1	0	0	0	0	0	0	0	0	1
SAL01923	G17-1	HS	Typhimurium	19	0	0	0	0	0	0	0	0	0	0
SAL01907	G17-2	HS	Typhimurium	19	0	0	0	0	0	0	0	0	0	0
SAL01905	G17-4	HS	Typhimurium	19	1	0	1	0	0	0	0	0	0	0
SAL01906	G17-5	HS	Typhimurium	19	0	0	0	0	0	0	0	0	0	0
SAL01926	G3-2	HS	Rissen	469	2	0	0	0	0	0	1	1	0	0
SAL01910	G3-3	CSBS	Typhimurium	34	2	0	0	0	0	0	1	1	0	0
SAL01860	H1-1-1	CSAS	Typhimurium	19	0	0	0	0	0	0	0	0	0	0
SAL01861	H1-1-2	CSAS	Derby	40	4	1	0	0	0	0	1	1	1	0
SAL01862	H1-1-3	CSAS	Typhimurium	19	0	0	0	0	0	0	0	0	0	0
SAL01849	H1-2-2	CSAS	Typhimurium	19	0	0	0	0	0	0	0	0	0	0
SAL01850	H1-2-3	CSAS	London	155	1	0	0	0	0	0	0	0	0	1
SAL01885	H1-4-1	CSAS	Typhimurium	34	0	0	0	0	0	0	0	0	0	0
SAL01852	H1-4-2	CSAS	Typhimurium	19	0	0	0	0	0	0	0	0	0	0
SAL01851	H1-4-3	CSAS	Typhimurium	19	0	0	0	0	0	0	0	0	0	0
SAL01853	H4-2-1	CSAS	Rissen	469	0	0	0	0	0	0	0	0	0	0
SAL01859	H6-3-4	CSAS	Rissen	469	0	0	0	0	0	0	0	0	0	0
SAL01857	H6-3-5	CSAS	Typhimurium	19	0	0	0	0	0	0	0	0	0	0
SAL01858	H6-3-6	CSAS	Rissen	469	0	0	0	0	0	0	0	0	0	0
SAL01863	J6-3-2	CSAS	Typhimurium	19	0	0	0	0	0	0	0	0	0	0
SAL01872	刮毛5-1-1	CSBS	London	155	1	0	0	0	0	0	0	0	0	1
SAL01874	刮毛5-1-2	CSBS	London	155	1	0	0	0	0	0	0	0	0	1
SAL01871	刮毛5-1-3	CSBS	London	155	1	0	0	0	0	0	0	0	0	1
SAL01873	刮毛5-1-4	CSBS	London	155	1	0	0	0	0	0	0	0	0	1
SAL01868	刮毛5-2-6	CSBS	London	155	1	0	0	0	0	0	0	0	0	1
SAL01869	刮毛5-2-7	CSBS	London	155	1	0	0	0	0	0	0	0	0	1
SAL01870	刮毛5-2-9	CSBS	London	155	2	0	1	0	0	0	0	0	0	1
SAL01864	刮毛6-1-1	CSBS	London	155	1	0	0	0	0	0	0	0	0	1
SAL01865	刮毛6-1-2	CSBS	London	155	1	0	0	0	0	0	0	0	0	1
SAL01866	刮毛6-1-3	CSBS	London	155	1	0	0	0	0	0	0	0	0	1
SAL01867	刮毛6-3-3	CSBS	London	155	1	0	0	0	0	0	0	0	0	1
SAL01878	下水道0-1	SS	Typhimurium	19	0	0	0	0	0	0	0	0	0	0
SAL01879	下水道0-2	SS	Typhimurium	19	0	0	0	0	0	0	0	0	0	0
SAL01880	下水道0-3	SS	Typhimurium	19	0	0	0	0	0	0	0	0	0	0
SAL01876	下水道2-1	SS	Rissen	469	0	0	0	0	0	0	0	0	0	0
SAL01877	下水道2-2	SS	Rissen	469	0	0	0	0	0	0	0	0	0	0
SAL01875	下水道2-3	SS	Rissen	469	0	0	0	0	0	0	0	0	0	0
